# Supplementary material for: Dynamic Measurement of a Cancer Biomarker: Towards In Situ Application of a Fiber-Optic Ball Resonator Biosensor in CD44 Protein Detection
Source: MDPI journal article supplement (doi:10.3390/s24061991), 2024-03-21
Supplement: s1 [file s1]

## Article

# Dynamic Measurement of a Cancer Biomarker: Towards In Situ Application of a Fiber-Optic Ball Resonator Biosensor in CD44 Protein Detection

Zhuldyz Myrkhiyeva <sup>1,2</sup>, Kanagat Kantoreyeva <sup>3</sup>, Aliya Bekmurzayeva <sup>1</sup>, Anthony W. Gomez <sup>1</sup>, Zhannat Ashikbayeva <sup>1,2</sup>, Meruyert Tilegen <sup>2</sup>, Tri T. Pham <sup>2</sup> and Daniele Tosi <sup>1,3,\*</sup>

<sup>1</sup> Laboratory of Biosensors and Bioinstruments, National Laboratory Astana, Nazarbayev University, 010000 Astana, Kazakhstan; zhuldyz.myrkhiyeva@nu.edu.kz (Z.M.); abekmurzayeva@nu.edu.kz (A.B.); anthony.gomez@nu.edu.kz (A.W.G.); zhashikbayeva@nu.edu.kz (Z.A.)

<sup>2</sup> Department of Biology, School of Sciences and Humanities, Nazarbayev University, 010000 Astana, Kazakhstan; meruyert.tilegen@nu.edu.kz (M.T.); tri.pham@nu.edu.kz (T.T.P.)

<sup>3</sup> Department of Electrical and Computer Engineering, School of Engineering and Digital Sciences, Nazarbayev University, 010000 Astana, Kazakhstan; kanagat.kantoreyeva@nu.edu.kz

\* Correspondence: danielle.tosi@nu.edu.kz

**Citation:** Myrkhiyeva, Z.; Kantoreyeva, K.; Bekmurzayeva, A.; Gomez, A.W.; Ashikbayeva, Z.; Tilegen, M.; Pham, T.T.; Tosi, D. Dynamic Measurement of a Cancer Biomarker: Towards In Situ Application of a Fiber-Optic Ball Resonator Biosensor in CD44 Protein Detection. *Sensors* **2024**, *24*, 1991. <https://doi.org/10.3390/s24061991>

Academic Editors: Hugo Aguas, Flavio Esposito and Benjamin L. Miller

Received: 4 January 2024

Revised: 15 March 2024

Accepted: 19 March 2024

Published: 21 March 2024

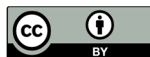

**Copyright:** © 2024 by the authors. Licensee MDPI, Basel, Switzerland. This article is an open access article distributed under the terms and conditions of the Creative Commons Attribution (CC BY) license (<https://creativecommons.org/licenses/by/4.0/>).

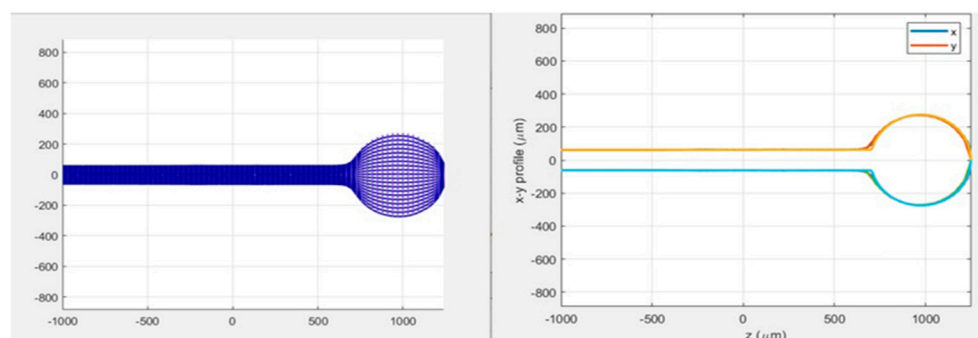

**Figure S1.** The geometrical 2D profile of a ball resonator 492–485  $\mu\text{m}$  fabricated by Fujikura LZM-100.

**Table S1.** Optical fiber ball resonator data.

|    | Sensor | Reflection<br>dB/mm  | Sensitivity<br>(dB/RIU) | R <sup>2</sup> | Purpose                  |
|----|--------|----------------------|-------------------------|----------------|--------------------------|
| 1  | 489 µm | air: 35<br>water: 47 | -96                     | 1.00           | Gamma globulin detection |
| 2  | 491 µm | air: 35<br>water: 48 | -90                     | 0.96           | CD44 detection           |
| 3  | 492 µm | air: 37<br>water: 47 | -98                     | 0.95           | CD44 detection           |
| 4  | 496 µm | air: 35<br>water: 45 | -83                     | 0.99           | CD44 detection           |
| 5  | 497 µm | air: 35<br>water: 50 | -98                     | 0.95           | CD44 detection           |
| 6  | 499 µm | air: 36<br>water: 48 | -85                     | 0.97           | CD44 detection           |
| 7  | 521 µm | air: 37<br>water: 49 | -128.37                 | 0.98           | CD44 detection           |
| 8  | 533 µm | air: 36<br>water: 46 | -105                    | 0.97           | CD44 detection           |
| 9  | 485 µm | air: 37<br>water: 50 | -83                     | 0.98           | Thrombin detection       |
| 10 | 518 µm | air: 44<br>water: 54 | -105                    | 0.95           | Thrombin detection       |
| 11 | 499 µm | air: 36<br>water: 48 | -84                     | 0.97           | Pressure measurement     |

**Table S2.** Splice parameters for ball resonators; recipe for Fujikura LZM-100 splicer.

| Parameter           | Settings   |
|---------------------|------------|
| Pre-heat            | 1          |
| Absolute power      | 342        |
| Relative power      | 150        |
| Feeding speed       | 0.2 mm/s   |
| Rotator speed       | 150 deg/s  |
| Diameter adjustment | 10 $\mu$ m |

**Table S3.** Mean height and root-mean-square (RMS) roughness of the sensor's surface determined from the obtained AFM height images ( $n \geq 40$ ).

| Treatment          | Piranha         | APTMS              | Heat             | GA               | AB              | mPEG             | Ball resonator  |
|--------------------|-----------------|--------------------|------------------|------------------|-----------------|------------------|-----------------|
| Height (nm)        | 4.05 $\pm$ 0.34 | 11.56 $\pm$ 4.1.05 | 12.77 $\pm$ 0.91 | 11.51 $\pm$ 0.95 | 8.55 $\pm$ 0.76 | 17.36 $\pm$ 0.95 | 11.0 $\pm$ 1.05 |
| RMS roughness (nm) | 1.53 $\pm$ 0.12 | 7.22 $\pm$ 0.62    | 8.45 $\pm$ 0.50  | 6.77 $\pm$ 0.51  | 4.70 $\pm$ 0.35 | 7.82 $\pm$ 1.03  | 6.19 $\pm$ 0.56 |

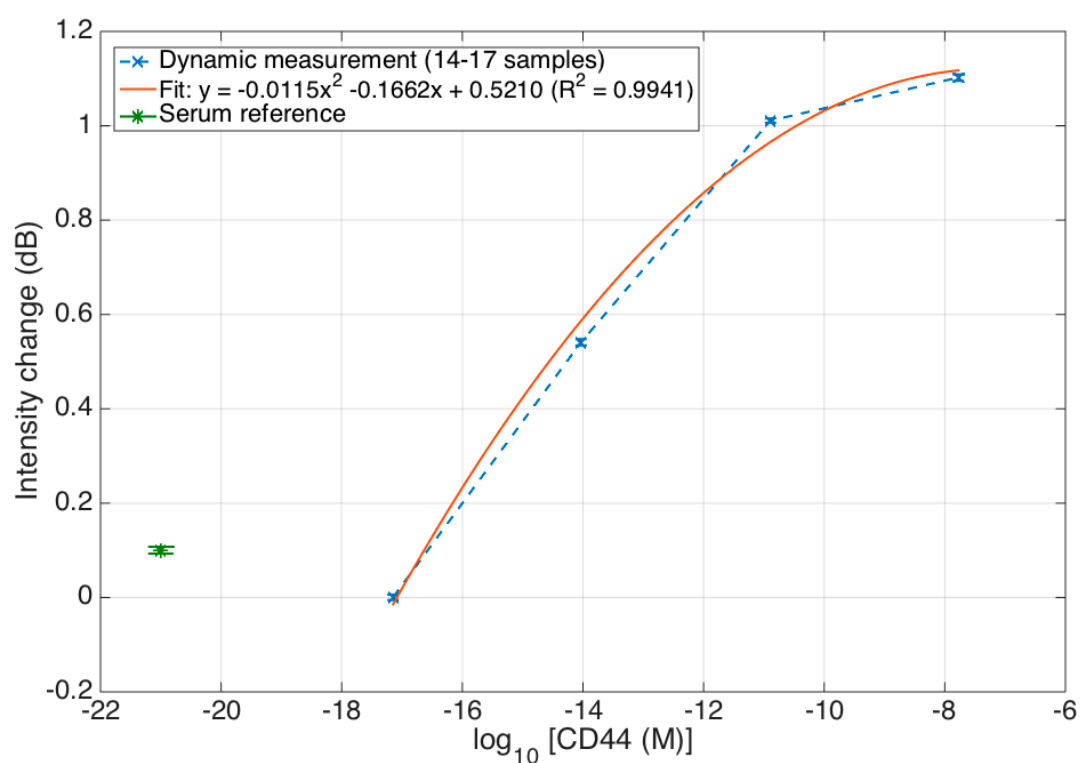

**Figure S2.** Output of the CD44 biosensor, reporting the intensity change for each concentration, and the blank sample. The sensitivity is obtained by log-quadratic fit. The estimated limit of detection is 2.93 fM, using the analytical method  $\text{LoD} = f^{-1}(x_{\text{blank}} + 3\sigma_{\text{max}})$ , where:  $f(x)$  is the log-quadratic fit,  $x_{\text{blank}}$  is the blank sample,  $\sigma_{\text{max}}$  is the maximum of the standard deviation for each concentration.

**Disclaimer/Publisher's Note:** The statements, opinions and data contained in all publications are solely those of the individual author(s) and contributor(s) and not of MDPI and/or the editor(s). MDPI and/or the editor(s) disclaim responsibility for any injury to people or property resulting from any ideas, methods, instructions or products referred to in the content.
